# Supplementary material for: Co-Clinical Imaging Metadata Information (CIMI) for Cancer Research to Promote Open Science, Standardization, and Reproducibility in Preclinical Imaging
Source: Tomography. 2023 May 11;9(3):995–1009. doi: 10.3390/tomography9030081 (PMC10204428; doi:10.3390/tomography9030081)
Supplement: Supplementary file 1 [file tomography-09-00081-s001.zip › tomography-2209289-supplementary.pdf]

## Supplemental Tables

| <b>Table S1:</b> Summary results for Imaging Common category                                   |                   |                  |                                                                                                                                                                            |
|------------------------------------------------------------------------------------------------|-------------------|------------------|----------------------------------------------------------------------------------------------------------------------------------------------------------------------------|
| <b>Element</b>                                                                                 | <b>Assessment</b> | <b>DICOM Tag</b> | <b>Definition</b>                                                                                                                                                          |
| These values not found in DICOM images                                                         |                   |                  |                                                                                                                                                                            |
| Rodent temperature during imaging                                                              | Essential         | NA               | Subject temperature and the means for taking the temperature can be expressed in a DICOM Structured Report. One would not expect to find these two items in a DICOM image. |
| Route temperature was assessed                                                                 | Essential         | NA               | Source of temperature reading (for example, rectal).                                                                                                                       |
| General Series Module                                                                          |                   |                  |                                                                                                                                                                            |
| Series Description                                                                             | Essential         | 0008,103E        | Description of the Series.                                                                                                                                                 |
| General Acquisition Module                                                                     |                   |                  |                                                                                                                                                                            |
| Acquisition Date                                                                               | Essential         | 0008,0022        | The date the acquisition of data that resulted in this instance started.                                                                                                   |
| Acquisition Time                                                                               | Essential         | 0008,0032        | The time the acquisition of data that resulted in this instance started.                                                                                                   |
| General Series Module                                                                          |                   |                  |                                                                                                                                                                            |
| Body Part Examined                                                                             | Essential         | 0018,0015        | Text description of the part of the body examined. <i>DICOM has defined terms for this field</i>                                                                           |
| Patient Position                                                                               | Essential         | 0018,5100        | Patient position descriptor relative to the patient support device.<br><i>Uses defined terms such as HFP (Head First-Prone), HFS (Head First-Supine), ...</i>              |
| General Equipment Module (PET Image, MR Image, Enhanced MR Image, CT Image, Enhanced CT Image) |                   |                  |                                                                                                                                                                            |
| Manufacturer                                                                                   | Essential         | 0008,0070        | Manufacturer of the equipment that produced the Composite Instances.                                                                                                       |
| Station Name                                                                                   | Recommended       | 0008,1010        | User defined name identifying the machine locally that produced the Composite Instances.                                                                                   |
| Manufacturer's Model Name                                                                      | Essential         | 0008,1090        | Manufacturer's model name of the equipment that produced the Composite Instances.                                                                                          |
| Device Serial Number                                                                           | Recommended       | 0018,1000        | Manufacturer's serial number of the equipment that produced the Composite Instances.                                                                                       |

|                                                                                          |             |                       |                                                                                                                                                                           |
|------------------------------------------------------------------------------------------|-------------|-----------------------|---------------------------------------------------------------------------------------------------------------------------------------------------------------------------|
| Software Versions                                                                        | Essential   | 0018,1020             | Manufacturer's designation of software version of the equipment that produced the Composite Instances.                                                                    |
| General Image Module (PET Image, MR Image, CT Image)                                     |             |                       |                                                                                                                                                                           |
| Patient Orientation                                                                      | Essential   | 0020,0020             | Patient direction of the rows and columns of the image.                                                                                                                   |
| Anatomical Orientation Type                                                              | Essential   | 0010,2210             | The anatomical orientation type used in Instances generated by this equipment.<br><br>Enumerated Values: BIPED, QUADRUPED                                                 |
| Image Plane Module (PET Image, MR Image, CT Image)                                       |             |                       |                                                                                                                                                                           |
| Pixel Spacing                                                                            | Essential   | 0028,0030             | Physical in-plane distance in the patient between the center of each pixel, specified by a numeric pair - adjacent row spacing (delimiter) adjacent column spacing in mm. |
| Image Orientation (Patient)                                                              | Essential   | 0020,0037             | The direction cosines of the first row and the first column with respect to the patient.                                                                                  |
| Image Position (Patient)                                                                 | Essential   | 0020,0032             | The x, y, and z coordinates of the upper left hand corner (center of the first voxel transmitted) of the image, in mm.                                                    |
| Slice Thickness                                                                          | Essential   | 0018,0050             | Nominal slice thickness, in mm.                                                                                                                                           |
| Spacing Between Slices                                                                   | Essential   | 0018,0088             | Spacing between adjacent slices, in mm. The spacing is measured from the center-to-center of each slice.                                                                  |
| Slice Location                                                                           | Recommended | 0020,1041             | Relative position of the image plane expressed in mm.                                                                                                                     |
| Voxel Size                                                                               | Essential   | NA                    | <i>Computed from Slice Thickness and Pixel Spacing</i>                                                                                                                    |
| Image Pixel Module (PET Image, MR Image, Enhanced MR Image, CT Image, Enhanced CT Image) |             |                       |                                                                                                                                                                           |
| Rows                                                                                     | Recommended | 0028,0010             | Number of rows in the image.                                                                                                                                              |
| Columns                                                                                  | Recommended | 0028,0011             | Number of columns in the image.                                                                                                                                           |
| Contrast/Bolus Module (MR Image, CT Image)                                               |             |                       |                                                                                                                                                                           |
| Contrast/Bolus Agent                                                                     | Essential   | 0018,0010             | Contrast or bolus agent.                                                                                                                                                  |
| Contrast/Bolus Route                                                                     | Essential   | 0018,1040             | Administration route of contrast agent.                                                                                                                                   |
| Contrast/Bolus Administrative Route Sequence ->                                          | Recommended | 0018,0014 > 0018,002A | Sequence that identifies any additional drug that is administered with the                                                                                                |

|                                         |           |           |                                                                                                                                          |
|-----------------------------------------|-----------|-----------|------------------------------------------------------------------------------------------------------------------------------------------|
| Additional Drug Sequence                |           |           | contrast agent bolus. One or more Items are permitted in this Sequence.                                                                  |
| Contrast/Bolus Volume                   | Essential | 0018,1041 | Volume injected in milliliters of diluted contrast agent.                                                                                |
| Contrast/Bolus Start Time               | Essential | 0018,1042 | Time of start of injection.                                                                                                              |
| Contrast/Bolus Stop Time                | Essential | 0018,1043 | Time of end of contrast injection.                                                                                                       |
| Contrast/Bolus Total Dose               | Essential | 0018,1044 | Total amount in milliliters of the undiluted contrast agent.                                                                             |
| Contrast Flow Rate                      | Essential | 0018,1046 | Rate(s) of injection(s) in milliliters/sec.                                                                                              |
| Contrast Flow Duration                  | Essential | 0018,1047 | Duration(s) of injection(s) in seconds. Each Contrast Flow Duration value shall correspond to a value of Contrast Flow Rate (0018,1046). |
| Contrast/Bolus Ingredient               | Essential | 0018,1048 | Active ingredient of agent. Defined Terms: IODINE, GADOLINIUM, CARBON DIOXIDE, BARIUM                                                    |
| Contrast/Bolus Ingredient Concentration | Essential | 0018,1049 | Milligrams of active ingredient per milliliter of (diluted) agent.                                                                       |

| Table S2: Summary results for PET & SPECT Imaging category |            |           |                                                                                                                                                                                                                                                                                                                     |
|------------------------------------------------------------|------------|-----------|---------------------------------------------------------------------------------------------------------------------------------------------------------------------------------------------------------------------------------------------------------------------------------------------------------------------|
| Element                                                    | Assessment | DICOM Tag | Definition                                                                                                                                                                                                                                                                                                          |
| PET Series Module                                          |            |           |                                                                                                                                                                                                                                                                                                                     |
| Units                                                      | Essential  | 0054,1001 | Pixel value units. The units of the pixel values obtained after conversion from the stored pixel values (SV) (Pixel Data (7FE0,0010)) to pixel value units (U), as defined by Rescale Intercept (0028,1052) and Rescale Slope (0028,1053). <i>Defined terms include CNTS, NONE, CM2, CM2ML, PCT, CPS, BQML, ...</i> |
| SUV type                                                   | Essential  | 0054,1006 | Type of Standardized Uptake Value (SUV). <i>Enumerated values: BSA, BW, LBM, LBMJAMES128, LBMJANMA, IBW</i>                                                                                                                                                                                                         |
| Counts Source                                              | Essential  | 0054,1002 | The primary source of counts. The primary source leads to the underlying image Units (0054,1001), as opposed to                                                                                                                                                                                                     |

|                               |             |           |                                                                                                                                                                                                                                                                                        |
|-------------------------------|-------------|-----------|----------------------------------------------------------------------------------------------------------------------------------------------------------------------------------------------------------------------------------------------------------------------------------------|
|                               |             |           | secondary sources that are used during reconstruction correction.<br>Enumerated Values: EMISSION, TRANSMISSION                                                                                                                                                                         |
| Series Type                   | Essential   | 0054,1000 | A multi-valued indicator of the type of Series. <i>Value 1: STATIC, DYNAMIC, GATED, WHOLE BODY.</i><br><i>Value 2: IMAGE, REPROJECTION</i>                                                                                                                                             |
| Reprojection method           | Recommended | 0054,1004 | Method for projecting volumetric data onto planar projection. Required if Series Type (0054,1000), Value 2 is REPROJECTION.<br>Defined Terms: SUM, MAX PIXEL                                                                                                                           |
| Number of Time Slots          | Essential   | 0054,0071 | The maximum number of Time Slots that may exist in this Series. Required if Series Type (0054,1000), Value 1 is GATED.                                                                                                                                                                 |
| Number of Time slices         | Essential   | 0054,0101 | The maximum number of Time Slices that may exist in this Series. Required if Series Type (0054,1000), Value 1 is DYNAMIC.                                                                                                                                                              |
| Number of Slices              | Essential   | 0054,0081 | The maximum number of Slices that may exist in this Series.                                                                                                                                                                                                                            |
| Corrected Image               | Essential   | 0028,0051 | One or more values that indicate which, if any, corrections have been applied to the image.                                                                                                                                                                                            |
| Randoms Correction Method     | Essential   | 0054,1100 | Type of randoms correction processing. Defined Terms: NONE (no randoms correction), DLYD (delayed event subtraction), SING (singles estimation)                                                                                                                                        |
| Attenuation Correction Method | Essential   | 0054,1101 | A textual description of the attenuation correction processing. e.g., measured vs. calculated, transmission source type (ring, line, point), assumed patient geometry (polygon, ellipse, segmented, attenuation coefficient, skull thickness), post-injection transmission, smoothing. |
| Scatter Correction Method     | Essential   | 0054,1105 | A textual description of the scatter correction processing. e.g., convolution-subtraction, dual energy window, model-based, use of attenuation data.                                                                                                                                   |

|                            |             |                       |                                                                                                                                                           |
|----------------------------|-------------|-----------------------|-----------------------------------------------------------------------------------------------------------------------------------------------------------|
| Decay Correction           | Essential   | 0054,1102             | The real-world event to which images in this Series were decay corrected. See Section C.8.9.1.1.5 for explanation. Defined Terms: NONE, START, ADMIN      |
| Reconstruction method      | Essential   | 0054,1103             | Textual description of reconstruction processing, e.g., 2D filtered backprojection, 2D iterative, 3D PROMIS, 3D FAVOR, 3D iterative.                      |
| Convolution Kernel         | Essential   | 0018,1210             | Textual description of the convolution kernel(s) used to reconstruct the data (e.g., name, cutoff, radial/axial/angular, mathematical form, DC handling). |
| Field of View Dimensions   | Essential   | 0018,1149             | Dimensions of the field of view, in mm. Transverse detector diameter followed by axial width.                                                             |
| Collimator Type            | Recommended | 0018,1181             | Collimator Type. Defined Terms: NONE, RING                                                                                                                |
| Collimator / Grid Name     | Recommended | 0018,1180             | Label describing the collimator used (LEAP, hires, etc.).                                                                                                 |
| Coincidence Window Width   | Recommended | 0054,1210             | The width of the coincidence timing window, in nsec. The maximum time difference accepted between two single events.                                      |
| Type of Detector Motion    | Recommended | 0054,0202             | Describes the detector motion during acquisition. Defined Terms: NONE, STEP AND SHOOT, CONTINUOUS, WOBBLE, CLAMSHELL                                      |
| PET Isotope Module         |             |                       |                                                                                                                                                           |
| Radionuclide Code Sequence | Essential   | 0054,0016 > 0054,0300 | <i>A coded item in a DICOM image that identifies the radionuclide. The coded item has several components and is not a simple text item.</i>               |
| Radiopharmaceutical Route  | Essential   | 0054,0016 > 0018,1070 | Route of administration.                                                                                                                                  |
| Radiopharmaceutical Volume | Recommended | 0054,0016 > 0018,1071 | Volume of administered radiopharmaceutical in cubic cm.                                                                                                   |

|                                           |             |                             |                                                                                                                                                                                                       |
|-------------------------------------------|-------------|-----------------------------|-------------------------------------------------------------------------------------------------------------------------------------------------------------------------------------------------------|
| Radiopharmaceutical Start DateTime        | Essential   | 0054,0016<br>><br>0018,1078 | Date and time of start of administration. The actual date and time of radiopharmaceutical administration to the patient for imaging purposes, using the same time base as Series Time (0008,0031).    |
| Radionuclide Total Dose                   | Essential   | 0054,0016<br>><br>0018,1074 | The radiopharmaceutical dose administered to the patient measured in Becquerels (Bq) at the Radiopharmaceutical Start Time (0018,1072).                                                               |
| Radiopharmaceutical Specific Activity     | Recommended | 0054,0016<br>><br>0018,1077 | The activity per unit mass of the radiopharmaceutical, in Bq/micromole, at the Radiopharmaceutical Start Time (0018,1072).                                                                            |
| Radiopharmaceutical                       | Essential   | 0054,0016<br>><br>0018,0031 | Name of the radiopharmaceutical.                                                                                                                                                                      |
| Intervention Drug Name                    | Essential   | 0018,0026<br>><br>0018,0034 | Name of the intervention drug.<br><i>Part of Intervention Drug Information Sequence that describes intervention drugs used.</i>                                                                       |
| Solvent                                   | Essential   |                             | Solvent used to prepare imaging agent for injection.                                                                                                                                                  |
| PET Multi-gated Acquisition Module        |             |                             |                                                                                                                                                                                                       |
| Trigger or Source Type                    | Recommended | 0018,1061                   | Text indicating trigger source. Defined Terms: EKG                                                                                                                                                    |
| Heart rate                                | Recommended | 0018,1088                   | Average number of heart beats per minute for the collection period for this image. This shall include all accepted beats as well as rejected beats.                                                   |
| NM/PET Patient Orientation Module         |             |                             |                                                                                                                                                                                                       |
| Patient Gantry Relationship Code Sequence | Essential   | 0054,0414                   | Describes the orientation of the patient with respect to the gantry. <i>Uses a defined vocabulary where the coded values will map to terms such as oblique, headfirst, feet-first, transverse ...</i> |
| General Image Module                      |             |                             |                                                                                                                                                                                                       |
| Lossy Image Compression                   | Essential   | 0028,2110                   | Specifies whether the Source Images have undergone lossy compression (at a point in their lifetime).                                                                                                  |

| PET Image Module                |             |           |                                                                                                                                                                                                                                                                                  |
|---------------------------------|-------------|-----------|----------------------------------------------------------------------------------------------------------------------------------------------------------------------------------------------------------------------------------------------------------------------------------|
| Image Type                      | Essential   | 0008,0008 | <i>One DICOM element with multiple fields that will indicate if the image is based on original/source data or is derived from other data; if the image was created as a direct result of the patient examination or after the original examination</i>                           |
| Frame time                      | Essential   | 0018,1063 | Nominal duration per individual frame, in msec. Required if Series Type (0054,1000), Value 1 is GATED.                                                                                                                                                                           |
| Image Index                     | Essential   | 0054,1330 | An index identifying the position of this image within a PET Series. See                                                                                                                                                                                                         |
| Actual Frame Duration           | Essential   | 0018,1242 | Elapsed time of data acquisition in msec per each frame.                                                                                                                                                                                                                         |
| Decay Factor                    | Essential   | 0054,1321 | The decay factor that was used to scale this image. Required if Decay Correction (0054, 1102) is other than NONE. If decay correction is applied, all images in the Series shall be decay corrected to the same time.                                                            |
| Dose Calibration Factor         | Essential   | 0054,1322 | Factor that was used to scale this image from counts/sec to Bq/ml using a dose calibrator. The value shall be one if no dose calibration was applied. See Section C.8.9.4.1.8 for explanation.                                                                                   |
| Isocenter Position              | Recommended | 300A,012C | Isocenter coordinates (x,y,z), in mm. Specifies the location of the machine isocenter in the Patient-Based Coordinate System associated with the Frame of Reference. It allows transformation from the Equipment-Based Coordinate System to the Patient-Based Coordinate System. |
| Iterative Reconstruction Method | Essential   | 0018,9769 | Iterative Reconstruction Method used. (yes/no)                                                                                                                                                                                                                                   |
| Iterative reconstruction number | Essential   | 0018,9739 | Required if Frame Type (0008,9007) Value 1 equals ORIGINAL and Iterative Reconstruction Method (0018,9769) equals YES. May be present otherwise.                                                                                                                                 |

|                                            |             |           |                                                                                                                                                  |
|--------------------------------------------|-------------|-----------|--------------------------------------------------------------------------------------------------------------------------------------------------|
| Iterative Reconstruction number of subsets | Essential   | 0018,9740 | Required if Frame Type (0008,9007) Value 1 equals ORIGINAL and Iterative Reconstruction Method (0018,9769) equals YES. May be present otherwise. |
| Number of views (SPECT)                    | Recommended | 0054,0053 | Number of angular views in this rotation.                                                                                                        |

| <b>Table S3:</b> Summary results for MR Imaging category |                   |                  |                                                                                                                                                                                                                                                                |
|----------------------------------------------------------|-------------------|------------------|----------------------------------------------------------------------------------------------------------------------------------------------------------------------------------------------------------------------------------------------------------------|
| <b>Element</b>                                           | <b>Assessment</b> | <b>DICOM Tag</b> | <b>Definition</b>                                                                                                                                                                                                                                              |
| <b>MR Image Module (MR Image)</b>                        |                   |                  |                                                                                                                                                                                                                                                                |
| Image Type                                               | Essential         | 0008,0008        | <i>For MR data, the 3<sup>rd</sup> value has these defined terms: DENSITY MAP, DIFFUSION MAP, IMAGE ADDITION, MODULUS SUBTRACT, MPR, OTHER, PHASE MAP, PHASE SUBTRAT, PROJECTION IMAGE, T1 MAP, T2 MAP, VELOCITY MAP</i>                                       |
| Photometric Interpretation                               | Essential         | 0028,0004        | Specifies the intended interpretation of the pixel data.<br><i>Enumerated values: MONOCHROME1, MONOCHROME2</i>                                                                                                                                                 |
| Scanning Sequence                                        | Essential         | 0018,0020        | Description of the type of data taken.<br>Enumerated Values:<br>SE (Spin Echo), IR (Inversion Recovery), GR (Gradient Recalled), EP (Echo Planar), RM (Research Mode)                                                                                          |
| Sequence Variant                                         | Essential         | 0018,0021        | Variant of the Scanning Sequence.<br>Defined Terms: SK (segmented k-space), MTC (magnetization transfer contrast), SS (steady state), TRSS (time reversed steady state), SP (spoiled), MP (MAG prepared), OSP (oversampling phase), NONE (no sequence variant) |
| Scan Options                                             | Essential         | 0018,0022        | Parameters of scanning sequence.<br>Defined Terms: PER, RG, CG, PPG, RC, PFF, PFP, SP, FS                                                                                                                                                                      |
| Respiratory Gating                                       | Essential         | NA               | Determined from Scan Options, 0018,0022                                                                                                                                                                                                                        |

|                     |           |           |                                                                                                                                                                                                                                                                                                            |
|---------------------|-----------|-----------|------------------------------------------------------------------------------------------------------------------------------------------------------------------------------------------------------------------------------------------------------------------------------------------------------------|
| MR Acquisition Type | Essential | 0018,0023 | Identification of data encoding scheme.<br>Enumerated Values: 2D (frequency x phase), 3D (frequency x phase x phase)                                                                                                                                                                                       |
| Repetition Time     | Essential | 0018,0080 | The period of time in msec between the beginning of a pulse sequence and the beginning of the succeeding (essentially identical) pulse sequence.                                                                                                                                                           |
| Echo Time           | Essential | 0018,0081 | Time in ms between the middle of the excitation pulse and the peak of the echo produced ( $k_x=0$ ). In the case of segmented k-space, the TE(eff) is the time between the middle of the excitation pulse to the peak of the echo that is used to cover the center of k-space (i.e., $-k_x=0$ , $k_y=0$ ). |
| Echo Train Length   | Essential | 0018,0091 | Number of lines in k-space acquired per excitation per image.                                                                                                                                                                                                                                              |
| Inversion Time      | Essential | 0018,0082 | Time in msec after the middle of inverting RF pulse to middle of excitation pulse to detect the amount of longitudinal magnetization.                                                                                                                                                                      |
| Trigger Time        | Essential | 0018,1060 | Time, in msec, between peak of the R wave and the peak of the echo produced.                                                                                                                                                                                                                               |
| Sequence Name       | Essential | 0018,0024 | User defined name for the combination of Scanning Sequence (0018,0020) and Sequence Variant (0018,0021).                                                                                                                                                                                                   |
| Angio Flag          | Essential | 0018,0025 | Angio Image Indicator. Primary image for Angio processing.<br>Enumerated Values: Y (Image is Angio), N (Image is not Angio)                                                                                                                                                                                |
| Number of averages  | Essential | 0018,0083 | Number of times a given pulse sequence is repeated and combined with the same parameter values.                                                                                                                                                                                                            |
| Imaging Frequency   | Essential | 0018,0084 | Precession frequency in MHz of the nucleus being addressed.                                                                                                                                                                                                                                                |

|                                   |           |           |                                                                                                                                                     |
|-----------------------------------|-----------|-----------|-----------------------------------------------------------------------------------------------------------------------------------------------------|
| Imaged Nucleus                    | Essential | 0018,0085 | Nucleus that is resonant at the imaging frequency. Examples: 31P, 1H.                                                                               |
| Echo Number(s)                    | Essential | 0018,0086 | The echo number used in generating this image. In the case of segmented k-space, it is the effective Echo Number.                                   |
| Magnetic Field Strength           | Essential | 0018,0087 | Nominal field strength of MR magnet, in Tesla.                                                                                                      |
| Number of Phase Encoding Steps    | Essential | 0018,0089 | Total number of lines in k-space in the 'y' direction collected during acquisition.                                                                 |
| Percent Sampling                  | Essential | 0018,0093 | Fraction of acquisition matrix lines acquired in the first phase encoding direction, expressed as a percent.                                        |
| Percent Phase Field of View       | Essential | 0018,0094 | Ratio of field of view dimension in phase direction to field of view dimension in frequency direction, expressed as a percent.                      |
| Pixel Bandwidth                   | Essential | 0018,0095 | Reciprocal of the total sampling period, in hertz per pixel.                                                                                        |
| Heart Rate                        | Essential | 0018,1088 | Average number of heart beats per minute for the collection period for this image. This shall include all accepted beats as well as rejected beats. |
| Receive Coil Name                 | Essential | 0018,1250 | Receive coil used.                                                                                                                                  |
| Coil Type and Diameter            | Essential | NA        | <i>Derived from Receive Coil Name</i>                                                                                                               |
| Transmit Coil Name                | Essential | 0018,1251 | Transmit coil used.                                                                                                                                 |
| Acquisition Matrix                | Essential | 0018,1310 | Dimensions of the acquired frequency /phase data before reconstruction.<br>Multi-valued: frequency rows\frequency columns\phase rows\phase columns. |
| In-plane Phase Encoding Direction | Essential | 0018,1312 | The axis of phase encoding with respect to the image.<br>Enumerated Values: ROW (phase encoded in rows.), COL (phase encoded in columns.)           |

|                                              |             |           |                                                                                                                                                                                                                                                                                  |
|----------------------------------------------|-------------|-----------|----------------------------------------------------------------------------------------------------------------------------------------------------------------------------------------------------------------------------------------------------------------------------------|
| Flip Angle                                   | Essential   | 0018,1314 | Steady state angle in degrees to which the magnetic vector is flipped from the magnetic vector of the primary field.                                                                                                                                                             |
| SAR                                          | Recommended | 0018,1316 | Calculated whole body Specific Absorption Rate in watts/kilogram.                                                                                                                                                                                                                |
| Variable Flip Angle Flag                     | Essential   | 0018,1315 | Flip angle variation applied during image acquisition.<br>Enumerated Values: Y, N                                                                                                                                                                                                |
| dB/dt                                        | Recommended | 0018,1318 | The rate of change of the gradient coil magnetic flux density with time (T/s).                                                                                                                                                                                                   |
| Temporal Position Identifier                 | Essential   | 0020,0100 | Temporal order of a dynamic or functional set of Images.                                                                                                                                                                                                                         |
| Number of temporal positions                 | Essential   | 0020,0105 | Total number of temporal positions prescribed.                                                                                                                                                                                                                                   |
| Temporal Resolution                          | Essential   | 0020,0110 | Time delta between Images in a dynamic or functional set of Images.                                                                                                                                                                                                              |
| Isocenter Position                           | Recommended | 300A,012C | Isocenter coordinates (x,y,z), in mm. Specifies the location of the machine isocenter in the Patient-Based Coordinate System associated with the Frame of Reference. It allows transformation from the Equipment-Based Coordinate System to the Patient-Based Coordinate System. |
| B1rms                                        | Recommended | 0018,1320 | B1+ rms value in units of microtesla ( $\mu$ T) for the acquisition producing the image. See [IEC 60601-2-33].                                                                                                                                                                   |
| Number of slices                             | Essential   | NA        | <i>Calculated from the image data itself</i>                                                                                                                                                                                                                                     |
| Acquired Voxel Size                          | Essential   | NA        | <i>Calculated from Acquisition Matrix, Rows, Columns, Pixel Spacing (x,y), Slice Thickness (z)</i>                                                                                                                                                                               |
| Enhanced MR Image Module (Enhanced MR Image) |             |           |                                                                                                                                                                                                                                                                                  |
| Acquisition Duration                         | Essential   | 0018,9073 | The time in seconds needed to complete the acquisition of data.                                                                                                                                                                                                                  |
| Resonant Nucleus                             | Essential   | 0018,9100 | Nucleus that is resonant at the transmitter frequency.<br><br>Defined Terms: 1H, 3HE, 7LI, 13C, 19F, 23NA, 31P, 129XE                                                                                                                                                            |

|                                                                       |           |                                         |                                                                                                                                                                                                                                                          |
|-----------------------------------------------------------------------|-----------|-----------------------------------------|----------------------------------------------------------------------------------------------------------------------------------------------------------------------------------------------------------------------------------------------------------|
| k-space Filtering                                                     | Essential | 0018,9064                               | Describes k-space filtering applied. Shall be NONE if no k-space filter. Defined Terms: COSINE, COSINE_SQUARED, FERMI, GAUSSIAN, HAMMING, HANNING, LORENTZIAN, LRNTZ_GSS_TRNSFM, RIESZ, TUKEY, NONE                                                      |
| View Code Sequence                                                    | Essential | 0054,0220                               | Sequence that describes the projection of the anatomic region of interest.                                                                                                                                                                               |
| Slice Progression Direction                                           | Essential | 0054,0500                               | Describes the anatomical direction in which a set of slices is progressing (see Section 10.20.1.1).<br><i>Uses enumerated values.</i>                                                                                                                    |
| Acquisition Contrast                                                  | Essential | 0008,9209                               | Indication of acquisition contrast used with frames in the SOP Instance. Defined Terms: DIFFUSION, FLOW_ENCODED, FLUID_ATTENUATED, PERFUSION, PROTON_DENSITY, STIR, TAGGING, T1, T2, T2_STAR, TOF, UNKNOWN, MIXED                                        |
| Enhanced MR Image Functional Group Macros: Pixel Value Transformation |           |                                         |                                                                                                                                                                                                                                                          |
| Rescale Intercept                                                     | Essential | 5200,9229 ><br>0028,9145 ><br>0028,1052 | The value b in relationship between stored values (SV) and the output units.<br>Output units = m*SV+b                                                                                                                                                    |
| Rescale Slope                                                         | Essential | 5200,9229 ><br>0028,9145 ><br>0028,1053 | The slope (m) in the equation specified in Rescale Intercept (0028,1052).                                                                                                                                                                                |
| Enhanced MR Image Functional Group Macros: MR Diffusion               |           |                                         |                                                                                                                                                                                                                                                          |
| Diffusion b-value                                                     | Essential | 5200,9229 ><br>0018,9117 ><br>0018,9087 | Identifies the diffusion parameters of this frame.<br><br>Diffusion sensitization factor in sec/mm <sup>2</sup> . This is the actual b-value for original frames and those derived from frames with the same b-value, or the most representative b-value |

|                                                                        |             |                                         |                                                                                                                                                                                                                                                                                                                                                                                       |
|------------------------------------------------------------------------|-------------|-----------------------------------------|---------------------------------------------------------------------------------------------------------------------------------------------------------------------------------------------------------------------------------------------------------------------------------------------------------------------------------------------------------------------------------------|
|                                                                        |             |                                         | when derived from images with different b-values.                                                                                                                                                                                                                                                                                                                                     |
| Diffusion Directionality                                               | Essential   | 5200,9229 ><br>0018,9117 ><br>0018,9075 | Identifies the diffusion parameters of this frame.<br><br>Specifies whether diffusion conditions for the frame are directional, or isotropic with respect to direction. Defined Terms: DIRECTIONAL, BMATRIX, ISOTROPIC, NONE                                                                                                                                                          |
| Diffusion b-matrix Sequence                                            | Essential   | 5200,9229 ><br>0018,9117 ><br>0018,9601 | The directional diffusion sensitization expressed as a 3x3 matrix with diagonal symmetry (with six unique elements from which the other elements can be derived). The rows and columns of the matrix are the X (right to left), Y (anterior to posterior) and Z (foot to head) patient-relative orthogonal axes as defined in Section C.7.6.2.1.1. The values are in units of ms/mm2. |
| Enhanced MR Image Functional Group Macros: Respiratory Synchronization |             |                                         |                                                                                                                                                                                                                                                                                                                                                                                       |
| Respiratory Motion Compensation Technique                              | Essential   | 5200,9229 ><br>0018,9170                | Applied technique to reduce respiratory motion artifacts.<br><br>Defined Terms: NONE, BREATH_HOLD, REALTIME, GATING, TRACKING, PHASE_ORDERING, PHASE_RESCANNING, RETROSPECTIVE, CORRECTION                                                                                                                                                                                            |
| Respiratory Signal Source                                              | Recommended | 5200,9229 ><br>0018,9171                | Signal source from which respiratory motion is derived.<br>Defined Terms: NONE, BELT, NASAL_PROBE, CO2_SENSOR, NAVIGATOR, MR_PHASE, ECG                                                                                                                                                                                                                                               |
| Respiratory Trigger Delay Threshold                                    | Recommended | 5200,9229 ><br>0020,9256                | Respiratory trigger threshold in percent of the chest expansion for the frame relative to the last Respiratory-Peak.                                                                                                                                                                                                                                                                  |

|                                                            |             |                                         |                                                                                                                                                             |
|------------------------------------------------------------|-------------|-----------------------------------------|-------------------------------------------------------------------------------------------------------------------------------------------------------------|
| Respiratory Trigger Type                                   | Recommended | 5200,9229 ><br>0020,9250                | Characteristic of the respiratory signal used to the define the respiratory triggering.<br>Defined Terms: TIME, AMPLITUDE, BOTH                             |
| Enhanced MR Image Functional Group Macros: MR FOV/Geometry |             |                                         |                                                                                                                                                             |
| MR Acquisition Frequency Encoding Steps                    | Essential   | 5200,9229 ><br>0018,9125 ><br>0018,9058 | Number of Frequency Encoding steps (kx) acquired                                                                                                            |
| MR Acquisition Phase Encoding Steps in-plane               | Essential   | 5200,9229 ><br>0018,9125 ><br>0018,9231 | Number of In-Plane Phase Encoding steps (ky) acquired                                                                                                       |
| MR Acquisition Phase Encoding Steps out-of-plane           | Essential   | 5200,9229 ><br>0018,9125 ><br>0018,9232 | Number of Out-of-Plane Phase Encoding steps (kz) acquired                                                                                                   |
| Enhanced MR Image Functional Group Macros: MR Modifier     |             |                                         |                                                                                                                                                             |
| Inversion Recovery                                         | Essential   | 5200,9229 ><br>0018,9115 ><br>0018,9009 | Inversion Recovery preparatory sequence.<br>Enumerated Values: YES, NO                                                                                      |
| Inversion Times                                            | Essential   | 5200,9229 ><br>0018,9115 ><br>0018,9079 | Times in ms after the middle of inverting RF pulse to middle of excitation pulse to detect the amount of longitudinal magnetization.                        |
| Flow Compensation                                          | Essential   | 5200,9229 ><br>0018,9115 ><br>0018,9010 | Flow Compensation.<br>Defined Terms: ACCELERATION, VELOCITY, OTHER, NONE                                                                                    |
| Flow Compensation Direction                                | Essential   | 5200,9229 ><br>0018,9115 ><br>0018,9183 | Flow Compensation Direction.<br>Enumerated Values: PHASE, FREQUENCY, SLICE_SELECT, SLICE_AND_FREQ, SLICE_FREQ_PHASE, PHASE_AND_FREQ, SLICE_AND_PHASE, OTHER |
| Spoiling                                                   | Essential   | 5200,9229 ><br>0018,9115 ><br>0018,9016 | Spoiling.<br>Enumerated Values: RF, GRADIENT, RF_AND_GRADIENT, NONE                                                                                         |
| T2 Preparation                                             | Essential   | 5200,9229 ><br>0018,9115 ><br>0018,9021 | T2 prepared Pulse Sequence.<br>Enumerated Values: YES, NO                                                                                                   |

|                                                                  |             |                                         |                                                                                                                                                                                      |
|------------------------------------------------------------------|-------------|-----------------------------------------|--------------------------------------------------------------------------------------------------------------------------------------------------------------------------------------|
| Spectrally Selected Excitation                                   | Essential   | 5200,9229 ><br>0018,9115 ><br>0018,9026 | Spectrally Selected Excitation.<br>Enumerated Values: WATER, FAT, NONE                                                                                                               |
| Spatial Pre-saturation                                           | Essential   | 5200,9229 ><br>0018,9115 ><br>0018,9027 | Spatial Pre-saturation.<br>Defined Terms: SLAB, NONE                                                                                                                                 |
| Partial Fourier                                                  | Essential   | 5200,9229 ><br>0018,9115 ><br>0018,9081 | Partial Fourier.<br>Enumerated Values: YES, NO                                                                                                                                       |
| Partial Fourier Direction                                        | Recommended | 5200,9229 ><br>0018,9115 ><br>0018,9036 | Direction of Partial Fourier.<br>Enumerated Values: PHASE, FREQUENCY, SLICE_SELECT, COMBINATION                                                                                      |
| Parallel Acquisition                                             | Essential   | 5200,9229 ><br>0018,9115 ><br>0018,9077 | Parallel acquisition has been used to reduce measurement time.<br>Enumerated Values: YES, NO                                                                                         |
| Parallel Acquisition Technique                                   | Essential   | 5200,9229 ><br>0018,9115 ><br>0018,9078 | Parallel acquisition characteristics.<br>Defined Terms: PILS, SENSE, SMASH, OTHER                                                                                                    |
| Parallel Reduction Factor In-plane                               | Essential   | 5200,9229 ><br>0018,9115 ><br>0018,9069 | Measurement time reduction factor expressed as ratio of original and reduced measurement time for the in-plane direction.                                                            |
| Parallel Reduction Factor out-of-plane                           | Recommended | 5200,9229 ><br>0018,9115 ><br>0018,9155 | Measurement time reduction factor expressed as ratio of original and reduced measurement time for the out-of-plane direction                                                         |
| Parallel Reduction Factor Second In-plane                        | Recommended | 5200,9229 ><br>0018,9115 ><br>0018,9168 | Measurement time reduction factor expressed as ratio of original and reduced measurement time for the second in-plane direction.<br>Only required for MR Spectroscopy SOP Instances. |
| Enhanced MR Image Functional Group Macros: MR Imaging Modifier   |             |                                         |                                                                                                                                                                                      |
| Magnetization Transfer                                           | Essential   | 5200,9229 ><br>0018,9006 ><br>0018,9020 | Magnetization Transfer pulse sequence.<br>Enumerated Values:<br>ON_RESONANCE, OFF_RESONANCE, NONE                                                                                    |
| Enhanced MR Image Functional Group Macros: MR Spatial Saturation |             |                                         |                                                                                                                                                                                      |

|                                                                 |             |                                         |                                                                                                                                                                                               |
|-----------------------------------------------------------------|-------------|-----------------------------------------|-----------------------------------------------------------------------------------------------------------------------------------------------------------------------------------------------|
| Slab Thickness                                                  | Essential   | 5200,9229 ><br>0018,9107 ><br>0018,9104 | Thickness of slab in mm.                                                                                                                                                                      |
| Slab Orientation                                                | Essential   | 5200,9229 ><br>0018,9107 ><br>0018,9105 | The direction cosines of a normal vector perpendicular to the saturation plane with respect to the patient.                                                                                   |
| Mid Slab Position                                               | Essential   | 5200,9229 ><br>0018,9107 ><br>0018,9106 | The x, y, and z coordinates of the midpoint of the slab plane in mm with respect to the patient.                                                                                              |
| Enhanced MR Image Functional Group Macros: MR Velocity Encoding |             |                                         |                                                                                                                                                                                               |
| Velocity Encoding Direction                                     | Recommended | 5200,9229 ><br>0018,9197 ><br>0018,9090 | Velocity encoding directions used for acquisition.<br><br>The direction cosines of the velocity encoding vector with respect to the patient. See Section C.7.6.2.1.1 for further explanation. |
| MR Pulse Sequence Module (Enhanced MR Image)                    |             |                                         |                                                                                                                                                                                               |
| Pulse Sequence Name                                             | Essential   | 0018,9005                               | Name of the pulse sequence for annotation purposes. Potentially vendor-specific name.                                                                                                         |
| MR Acquisition Type                                             | Essential   | 0018,0023                               | Identification of spatial data encoding scheme.<br>Defined Terms: 1D, 2D, 3D                                                                                                                  |
| Echo Pulse Sequence                                             | Essential   | 0018,9008                               | Echo category of pulse sequences.<br>Enumerated Values: SPIN, GRADIENT, BOTH                                                                                                                  |
| Multiple Spin Echo                                              | Essential   | 0018,9011                               | Multiple Spin Echo category of pulse sequence used to collect different lines in k-space for a single frame.<br>Enumerated Values: YES, NO                                                    |
| Multi-planar Excitation                                         | Essential   | 0018,9012                               | Technique that simultaneously excites several volumes.<br>Enumerated Values: YES, NO                                                                                                          |
| Phase Contrast                                                  | Essential   | 0018,9014                               | Phase contrast pulse sequence is a pulse sequence in which the flowing spins are velocity encoded in phase.<br>Enumerated Values: YES, NO                                                     |
| Time of Flight Contrast                                         | Recommended | 0018,9015                               | Time of Flight contrast is created by the inflow of blood in the saturated plane.                                                                                                             |

|                                     |             |           |                                                                                                                                                                                                                                    |
|-------------------------------------|-------------|-----------|------------------------------------------------------------------------------------------------------------------------------------------------------------------------------------------------------------------------------------|
|                                     |             |           | Enumerated Values: YES, NO                                                                                                                                                                                                         |
| Arterial Spin Labeling Contrast     | Essential   | 0018,9250 | Arterial Spin Labeling contrast technique.<br>Enumerated Values: CONTINUOUS (a single long low powered RF pulse), PSEUDOCONTINUOUS (multiple short low powered RF pulses), PULSED (a single short high powered RF pulse)           |
| Steady State Pulse Sequence         | Essential   | 0018,9017 | Steady State Sequence.<br>Defined Terms: FREE_PRECESSION, TRANSVERSE, TIME_REVERSED, LONGITUDINAL, NONE                                                                                                                            |
| Echo Planar Pulse Sequence          | Essential   | 0018,9018 | Echo Planar category of Pulse Sequences.<br>Enumerated Values: YES, NO                                                                                                                                                             |
| Saturation Recovery                 | Essential   | 0018,9024 | Saturation recovery pulse sequence.<br>Enumerated Values: YES, NO                                                                                                                                                                  |
| Spectrally Selected Suppression     | Essential   | 0018,9025 | Spectrally Selected Suppression.<br>Defined Terms: FAT, WATER, FAT_AND_WATER, SILICON_GEL, NONE                                                                                                                                    |
| Oversampling Phase                  | Recommended | 0018,9029 | Oversampling Phase.<br>Enumerated Values: 2D (phase direction), 3D (out of plane direction), 2D_3D (both), NONE                                                                                                                    |
| Geometry of k-Space Traversal       | Essential   | 0018,9032 | Geometry category of k-Space traversal.<br>Defined Terms: RECTILINEAR, RADIAL, SPIRAL                                                                                                                                              |
| Rectilinear Phase Encode Reordering | Recommended | 0018,9034 | Rectilinear phase encode reordering.<br>Defined Terms: LINEAR, CENTRIC, SEGMENTED, REVERSE_LINEAR, REVERSE_CENTRIC                                                                                                                 |
| Segmented k-Space Traversal         | Recommended | 0018,9033 | Segmented k-Space traversal. If Geometry of k-Space Traversal is rectilinear, multiple lines can be acquired at one time. If Geometry of k-Space Traversal is spiral or radial, paths can be interleaved and acquired at one time. |

|                                |             |           |                                                                                                                             |
|--------------------------------|-------------|-----------|-----------------------------------------------------------------------------------------------------------------------------|
|                                |             |           | Enumerated Values: SINGLE (successive single echo coverage), PARTIAL (segmented coverage), FULL (single shot full coverage) |
| Coverage of k-Space            | Recommended | 0018,9094 | Coverage of k-Space in the ky-kz plane.<br>Defined Terms: FULL, CYLINDRICAL, ELLIPSOIDAL, WEIGHTED                          |
| Number of k-Space Trajectories | Recommended | 0018,9093 | Number of interleaves or shots.                                                                                             |

| Table S4: Summary results for CT Imaging category |             |           |                                                                                                                                                                                                                                                                                                       |
|---------------------------------------------------|-------------|-----------|-------------------------------------------------------------------------------------------------------------------------------------------------------------------------------------------------------------------------------------------------------------------------------------------------------|
| Element                                           | Assessment  | DICOM Tag | Definition                                                                                                                                                                                                                                                                                            |
| General Reference Module                          |             |           |                                                                                                                                                                                                                                                                                                       |
| Derivation Description                            | Essential   | 0008,2111 | A text description of how this image was derived.                                                                                                                                                                                                                                                     |
| CT Image Module                                   |             |           |                                                                                                                                                                                                                                                                                                       |
| Image Type                                        | Recommended | 0008,0008 | <i>For CT data, the 3<sup>rd</sup> value has these defined terms: AXIAL, LOCALIZER. The 4<sup>th</sup> value is required if Multi-energy Acquisition (0018,9361) has a value of YES.</i>                                                                                                              |
| Multi-energy CT Acquisition                       | Essential   | 0018,9361 | Indicates whether the image is created by means of Multi-energy technique.<br>Enumerated Values: YES, NO                                                                                                                                                                                              |
| Rescale Intercept                                 | Essential   | 0028,1052 | The value b in relationship between stored values (SV) and the output units.<br>Output units = m*SV+b<br>If Image Type (0008,0008) Value 1 is ORIGINAL and Value 3 is not LOCALIZER, and Multi-energy CT Acquisition (0018,9361) is either absent or NO, output units shall be Hounsfield Units (HU). |
| Rescale Slope                                     | Essential   | 0028,1053 | The slope (m) in the equation specified in Rescale Intercept (0028,1052).                                                                                                                                                                                                                             |

|                                  |             |           |                                                                                                                                                                                                                                                                                                            |
|----------------------------------|-------------|-----------|------------------------------------------------------------------------------------------------------------------------------------------------------------------------------------------------------------------------------------------------------------------------------------------------------------|
| Rescale Type                     | Essential   | 0028,1054 | Specifies the output units of Rescale Slope (0028,1053) and Rescale Intercept (0028,1052).<br>See Section C.11.1.1.2 for Defined Terms and further explanation.<br>Required if the Rescale Type is not HU (Hounsfield Units), or Multi-energy CT Acquisition (0018,9361) is YES. May be present otherwise. |
| KVP                              | Essential   | 0018,0060 | Peak kilo voltage output of the X-Ray generator used.                                                                                                                                                                                                                                                      |
| Acquisition Number               | Essential   | 0020,0012 | A number identifying the single continuous gathering of data over a period of time that resulted in this image.                                                                                                                                                                                            |
| Scan Options                     | Essential   | 0018,0022 | Parameters of scanning sequence.                                                                                                                                                                                                                                                                           |
| Data Collection Center (Patient) | Recommended | 0018,9313 | The x, y, and z coordinates (in the Patient-Based Coordinate System) in mm of the center of the region in which data were collected. See Section C.8.15.3.6.1.                                                                                                                                             |
| Distance Source to Detector      | Recommended | 0018,1110 | Distance in mm from source to detector center.                                                                                                                                                                                                                                                             |
| Distance Source to Patient       | Recommended | 0018,1111 | Distance in mm from source to isocenter (center of field of view).                                                                                                                                                                                                                                         |
| Magnification                    | Recommended | NA        | <i>Computed from Distance Source to Detector (0018,1110) and Distance Source to Patient (0018,1111)</i>                                                                                                                                                                                                    |
| Exposure Time                    | Essential   | 0018,1150 | Time of X-Ray exposure in msec.<br>If Acquisition Type (0018,9302) equals SPIRAL, the value of this Attribute shall be Revolution Time (0018,9305) divided by the Spiral Pitch Factor (0018,9311). See Section C.8.15.3.8.1 and Section C.8.15.3.2.1.                                                      |
| X-Ray Tube Current               | Essential   | 0018,1151 | X-Ray Tube Current in mA.                                                                                                                                                                                                                                                                                  |
| Filter Type                      | Essential   | 0018,1160 | Label for the type of filter inserted into the X-Ray beam.                                                                                                                                                                                                                                                 |
| Focal Spot(s)                    | Essential   | 0018,1190 | Size of the focal spot in mm. For devices with variable focal spot or                                                                                                                                                                                                                                      |

|                                                                      |             |                                         |                                                                                                                                                                                                                                                                                  |
|----------------------------------------------------------------------|-------------|-----------------------------------------|----------------------------------------------------------------------------------------------------------------------------------------------------------------------------------------------------------------------------------------------------------------------------------|
|                                                                      |             |                                         | multiple focal spots, small dimension followed by large dimension.                                                                                                                                                                                                               |
| Convolution Kernel                                                   | Essential   | 0018,1210                               | A label describing the convolution kernel or algorithm used to reconstruct the data.                                                                                                                                                                                             |
| Single Collimation Width                                             | Recommended | 0018,9306                               | The width of a single row of acquired data (in mm).                                                                                                                                                                                                                              |
| Total Collimation Width                                              | Recommended | 0018,9307                               | The width of the total collimation (in mm) over the area of active X-Ray detection.                                                                                                                                                                                              |
| Exposure Modulation Type                                             | Essential   | 0018,9323                               | A label describing the type of exposure modulation used for the purpose of limiting the dose.<br>Defined Terms: NONE                                                                                                                                                             |
| Isocenter Position                                                   | Recommended | 300A,012C                               | Isocenter coordinates (x,y,z), in mm. Specifies the location of the machine isocenter in the Patient-Based Coordinate System associated with the Frame of Reference. It allows transformation from the Equipment-Based Coordinate System to the Patient-Based Coordinate System. |
| Enhanced CT Image Functional Group Macros: CT Acquisition Type Macro |             |                                         |                                                                                                                                                                                                                                                                                  |
| Acquisition Mode                                                     | Recommended | 5200,9229 ><br>0018,9301 ><br>0018,9302 | Description of the method used during acquisition of this frame.<br><i>Defined Terms: SEQUENCED, SPIRAL, CONSTANT_ANGLE, STATIONARY, FREE</i>                                                                                                                                    |
| Respiratory Synchronization Module (Enhanced CT Image)               |             |                                         |                                                                                                                                                                                                                                                                                  |
| Respiratory Motion Compensation Technique                            | Essential   | 0018,9170                               | Applied technique to reduce respiratory motion artifacts.<br>Defined Terms: NONE, BREATH_HOLD, REALTIME, GATING, TRACKING, PHASE_ORDERING, PHASE_RESCANNING, RETROSPECTIVE, CORRECTION                                                                                           |
| Private Elements                                                     |             |                                         |                                                                                                                                                                                                                                                                                  |
| Beam Hardening Correction Flag                                       | Essential   | NA                                      | A flag used to define whether the projection data has been corrected for beam hardening effects*                                                                                                                                                                                 |

\*McCollough, et. al. have suggested a set of private DICOM tags to record vendor neutral data in raw projection data. One of the private elements is Beam Hardening Correction Flag with values of “YES” or “NO”.

### **References**

McCollough, C.H., Chen, B., Holmes, D., III, Duan, X., Yu, Z., Yu, L., Leng, S., Fletcher, J. (2020). Data from Low Dose CT Image and Projection Data [Data set]. The Cancer Imaging Archive.  
[https://wiki.cancerimagingarchive.net/download/attachments/52758026/DICOM-CT-PD%20User%20Manual\\_Version%203.pdf?version=1&modificationDate=1586187875073&api=v2](https://wiki.cancerimagingarchive.net/download/attachments/52758026/DICOM-CT-PD%20User%20Manual_Version%203.pdf?version=1&modificationDate=1586187875073&api=v2)
